# Supplementary material
Source: PubMed Central journal article supplement (PMC3190384)
Supplement: supp_138.21.4709_DEV067710TableS1.pdf [file supp_138.21.4709_DEV067710TableS1.pdf]

**Table 1. Primer sequences for expression analysis and the ETS2 CHIP experiments**

| Expression analysis | Forward primer         | Reverse primer         |
|---------------------|------------------------|------------------------|
| ETS1                | GATATCCTGTGGGAGCATCTAG | GAAGTAAACCGAGGTGTAACAG |
| ETS2                | GGGAACATCTAGAGCAGATG   | GTCCAGGAGATTGTCTTTGG   |
| NRF2                | CCGCTACACCGACTACGATT   | ACCTTCATCACCAACCCAAG   |
| TBK1                | AGGGCTTTGTGACGGGAACAG  | GGCACCCGGTCAAATGAGA    |
| Cdkn1c              | GTTCTCCTGCGCAGTTCTCT   | GAGCTGAAGGACCAGCCTC    |
| Hjurp               | CAGAGGCTTCTCTCATCGCT   | TAAATGGGCAAGCTCCAGA    |
| Cdca3               | GCTGTTCTGCTGGTAGGCTT   | TCGAGTAGCAGACCCTCGTT   |
| Cdca2               | CGATGCAATGTCTCTTGGC    | GCGGCACTTCTAAAAAGAA    |
| Birc5               | CAGGGGAGTGCTTTCTATGC   | TACCGAGAACGAGCCTGATT   |
| Ccnb1               | GGCTTGGAGAGGGATTATCA   | ACCAGAGGTGGAACCTGCTG   |
| Kif2c               | CTGAGCAGGGATTGCAACTT   | CGCAAATCAGTCAACTCCAA   |
| Prc1                | AGAGCTTTCTGCAGGCATGT   | GAGGGTCTCGATTCTGGACA   |
| Uhrf1               | TTGAGGCGCACATCATAATC   | GCAGGAGCTGAGGAAAAAGA   |
| Aurka               | AGCGTTTGCCAACTCAGTG    | TCTAGAATATGCGCCCTTG    |
| Mcm6                | CGTGTCTCTCAGGACGAA     | GAAATGCCAGAAGCTGTTCC   |
| Plk1                | AGGAGTGCCACACAAGGTCT   | CGCAATCAGGTCATTACAG    |
| Mcm2                | TCAGTCTCTCCACATCTTCA   | AGGAACTCATTGGTGATGGC   |
| Cdc20               | GGAGACCAGAGGATGGAGC    | CAGGAGGAGGAACCAAGTAC   |
| 6720463M24Rik       | GATCCCCGTAGAAGCTGTTG   | ATCGCACTCAAGGAGGAAA    |
| Ncaph               | GAACATCCTGTTGCTCTCGG   | ACTTACTCCGGAGACGTGGA   |
| Cyclophilin         | TGCCAGGGTGGTACTTTAC    | GGACCTGTATGCTTCAGGATGA |
| ETS2 CHIP           | Forward primer         | Reverse primer         |
| Cdkn1c 217          | GGCCTCTCACGATTAGCAT    | CCGCAGAGCTCTTTAACTCG   |
| Hjurp 102           | CTCCCCTTCTCGTTTCCAC    | CGCGCTAATAGGGTCTTTCA   |
| Hjurp 856           | CAGAAGCCCAGGATCTTGAA   | CTGAGGGAGGGAAGAAGAGC   |
| Cdca3 114           | TTGGCCAGTCTCATGATAG    | TATTGGCTAAGCCGAAGCAG   |
| Birc5 154           | GACTTGACAGCGGACATGCT   | AGGGCATGCTGGGAGTTGTA   |
| Kif2c 119           | AAACCAAACAACCAACCAACC  | GCCAGCCTCCCTACAACG     |
| Prc1 116            | CCTAGGCAGCAGCCCTTC     | GAATTCAAACCGAGCCAGAG   |
| Uhrf1 155           | TCTTGGTAAAGTGAGCATAGCC | GTGGGGAGGGCTCTTGAT     |
| Uhrf1 882           | CAGTCCAGGTGCCTCCTC     | CAATTCCAGGTACATCCACAAG |
| Aurka 196           | GATAGAACGGCCGAGAT      | TAAACGCGACTATGGGAAGC   |
| Mcm6 11             | CCCTGTTATTGGCTGAGGTG   | GAGAGTACGCGCTGCTGAG    |
| Plk1 794            | TTTTCTATTTGGGGCTCTGG   | CAGCTACCGCTCCACTAACC   |
| Mcm2 85             | CAGCCTTTGAAAGCTGTGG    | GCGAAAACCTAGACCACGTGAC |
| Cdc20 179           | AGAGATGGGTTCCGGGATTTT  | TAGCGTTTATTGGCTCCTTC   |
| 6720463M24Rik 41    | GACCGCGTTGATTTGAATTT   | TTAACTCCCTCCGTGCTCTC   |
| 6720463M24Rik 563   | AGCAGGCGCCAGACACTT     | CCAGAGCTCCGGTCTTCC     |
| Ncaph               | GTGACCCAGCTGAAGACGTT   | GGCAAAGAACCTCGATTCC    |
| Cdca2               | GTCTGGGGTCTACCAGTGA    | ATCGGGATTGGCTAATAGGG   |
| Ccnb1               | CACTCGCTCTTCCATTG      | CAGGCATAGAGCCTGACCTC   |
