# Supplementary material
Source: PubMed Central journal article supplement (PMC3190384)

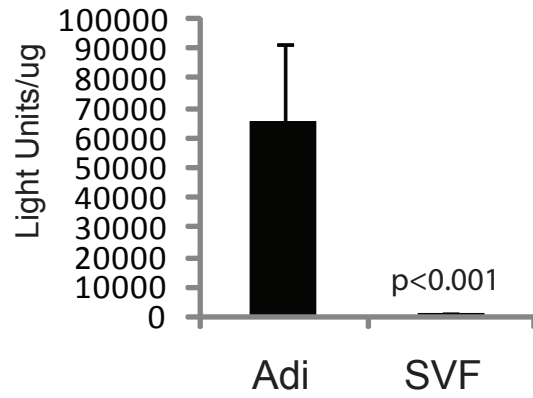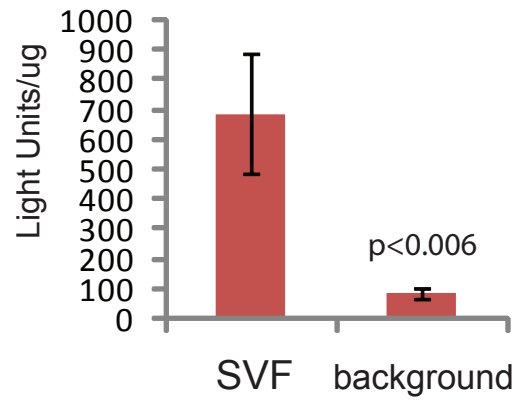

Supplement: supp_138.21.4709_DEV067710FigS1.pdf [file supp_138.21.4709_DEV067710FigS1.pdf]

A

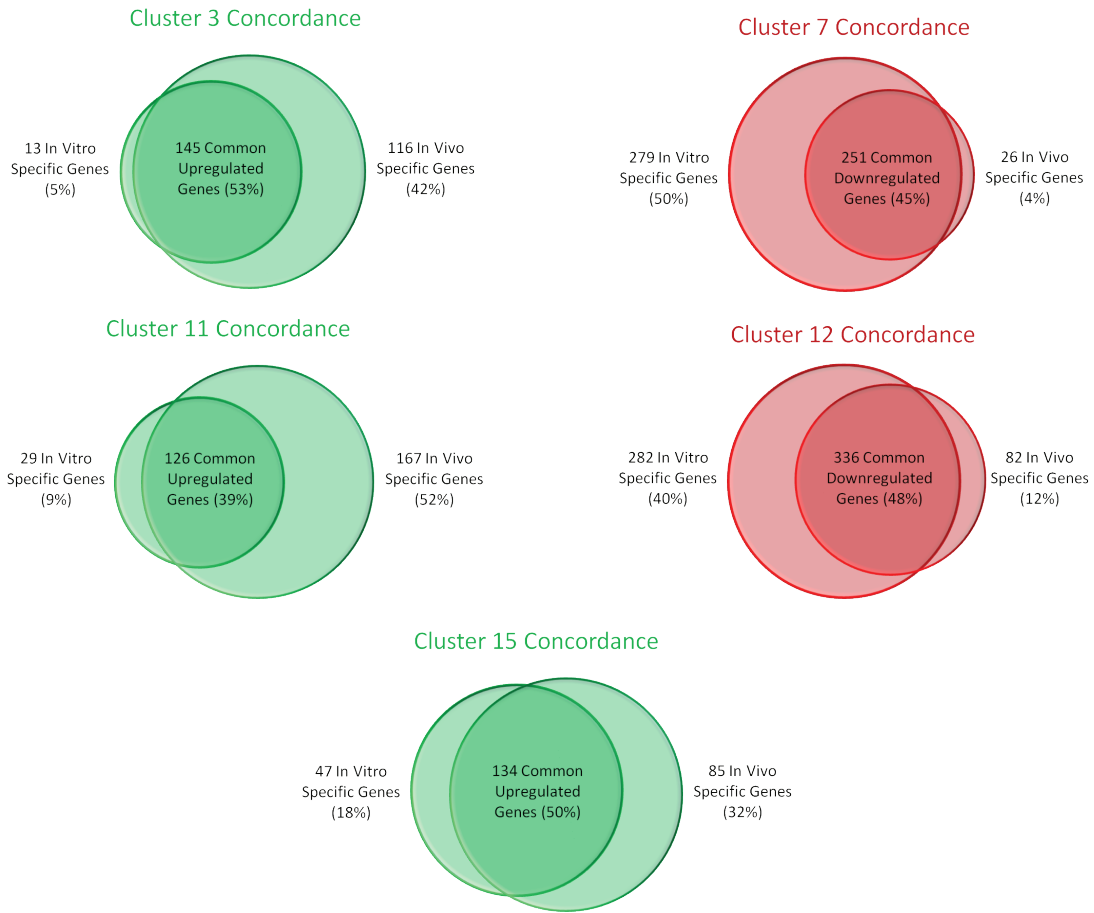

B

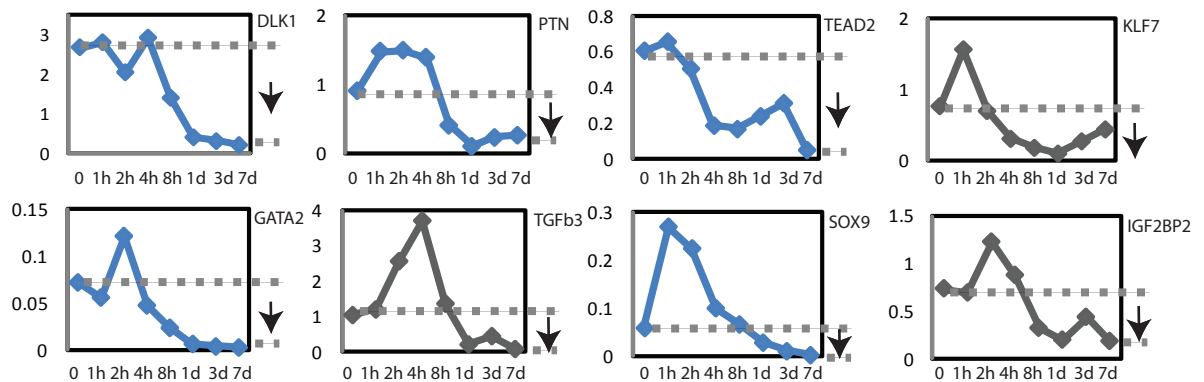

Supplement: supp_138.21.4709_DEV067710FigS2.pdf [file supp_138.21.4709_DEV067710FigS2.pdf]

**A**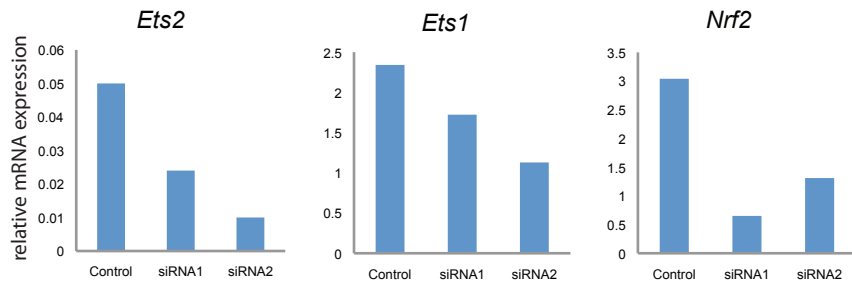**B**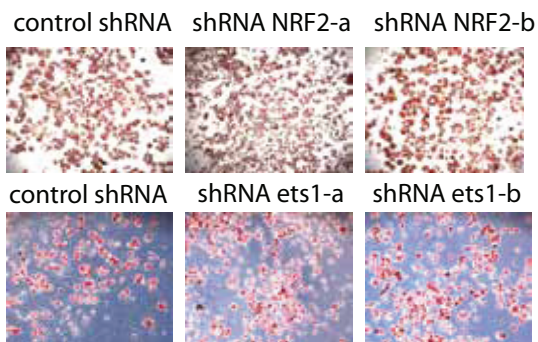

Supplement: supp_138.21.4709_DEV067710FigS3.pdf [file supp_138.21.4709_DEV067710FigS3.pdf]

A

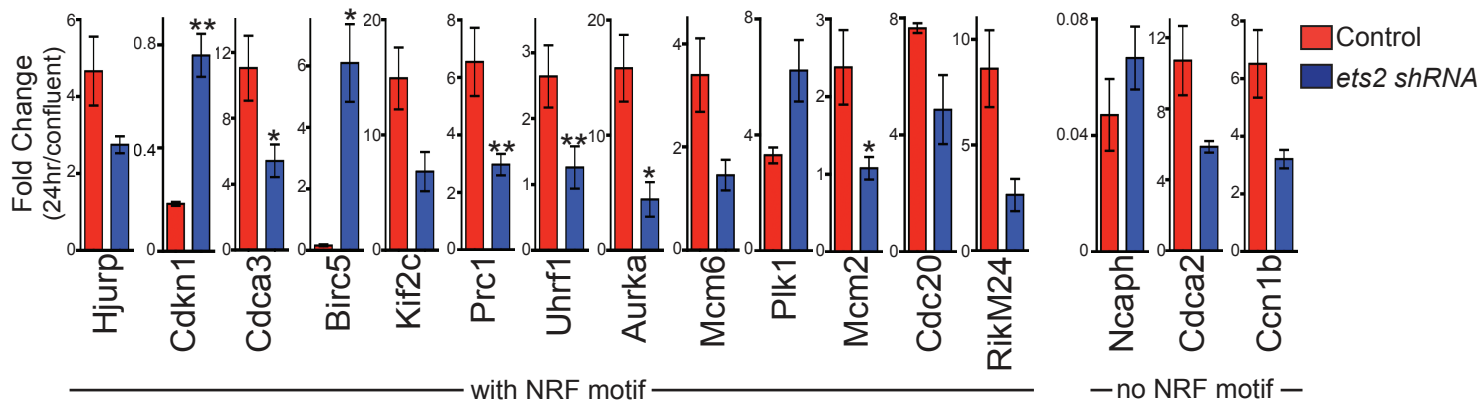

B

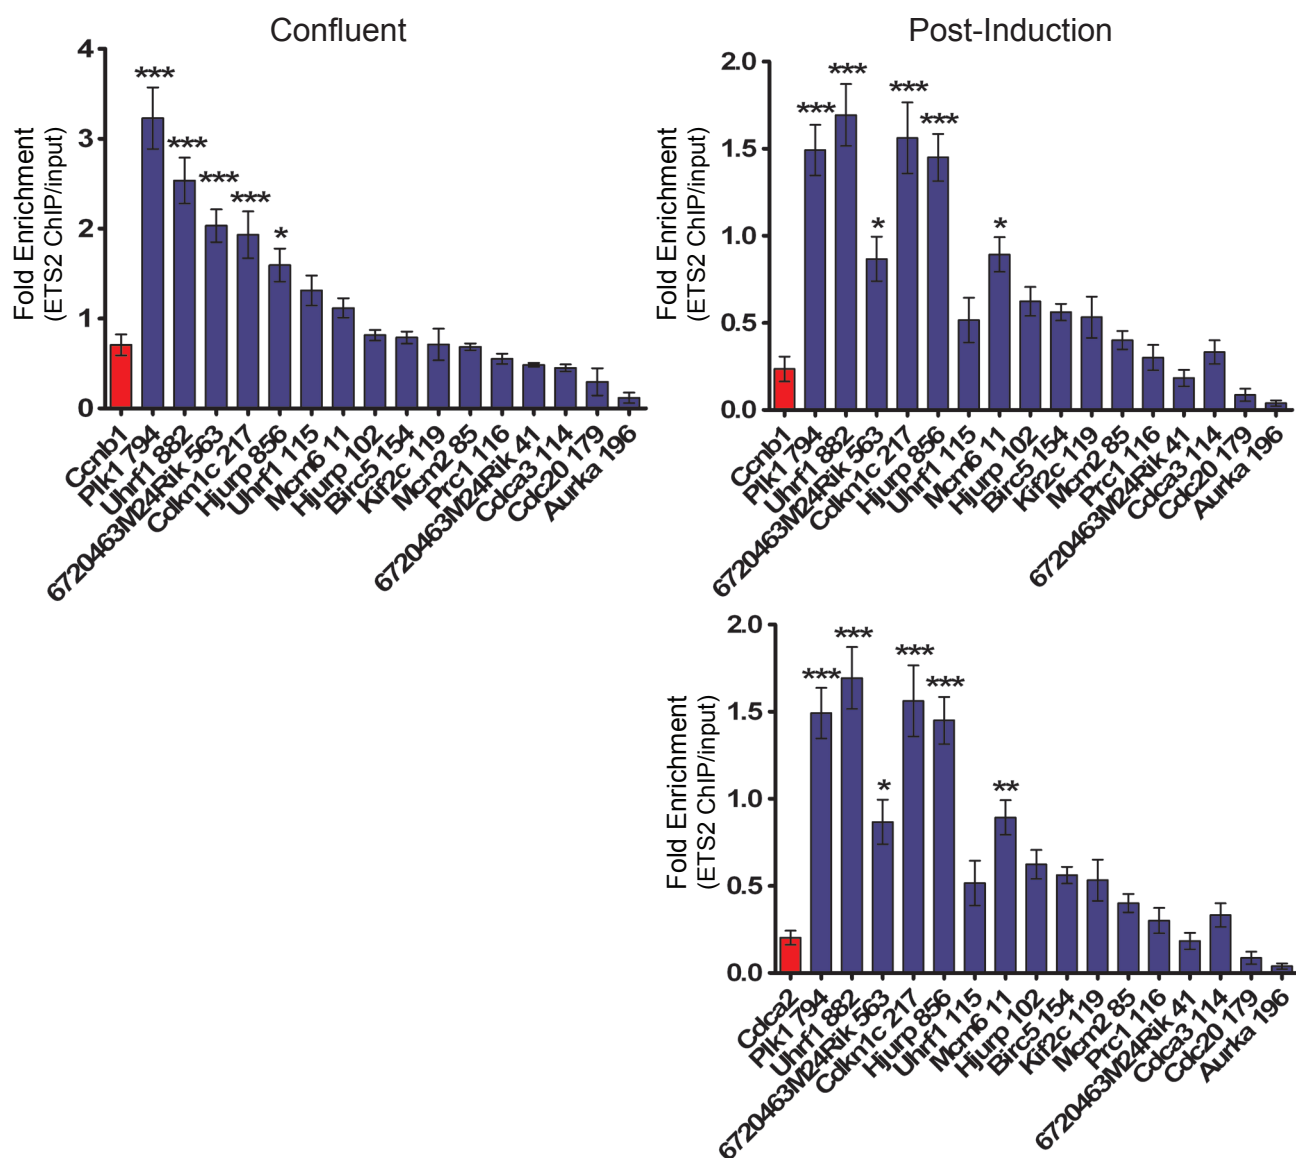

Supplement: supp_138.21.4709_DEV067710FigS4.pdf [file supp_138.21.4709_DEV067710FigS4.pdf]
